# Supplementary material for: Opportunistic assessment of ischemic heart disease risk using abdominopelvic computed tomography and medical record data: a multimodal explainable artificial intelligence approach
Source: PubMed Central journal article supplement (PMC10687235; doi:10.1038/s41598-023-47895-y), 2023-11-29
Supplement: 41598_2023_47895_MOESM3_ESM.pdf [file 41598_2023_47895_MOESM3_ESM.pdf]

| Subpopulation                                                                      | Model                                | 1-year cohort           |                         | 5-year cohort           |                         |
|------------------------------------------------------------------------------------|--------------------------------------|-------------------------|-------------------------|-------------------------|-------------------------|
|                                                                                    |                                      | AUROC (95% CI)          | AUCPR (95% CI)          | AUROC (95% CI)          | AUCPR (95% CI)          |
| Complete PCE data (1y n=328, % IHD positive=3.7) / (5y n=69, % IHD positive=30.4)  | FRS                                  | 0.64 (0.49-0.77)        | 0.06 (0.04-0.11)        | 0.72 (0.61-0.82)        | 0.47 (0.38-0.64)        |
|                                                                                    | PCE                                  | 0.70 (0.57-0.82)        | <b>0.10 (0.06-0.27)</b> | 0.75 (0.65-0.84)        | 0.53 (0.43-0.72)        |
|                                                                                    | Segmentation only                    | 0.53 (0.39-0.65)        | 0.04 (0.03-0.07)        | 0.63 (0.50-0.73)        | 0.44 (0.34-0.59)        |
|                                                                                    | PCE+Segmentation                     | 0.66 (0.53-0.79)        | 0.06 (0.05-0.11)        | 0.69 (0.57-0.80)        | 0.51 (0.40-0.66)        |
|                                                                                    | Clinical only                        | 0.69 (0.55-0.81)        | 0.08 (0.05-0.13)        | 0.81 (0.72-0.90)        | 0.65 (0.53-0.80)        |
|                                                                                    | Imaging only                         | 0.63 (0.51-0.74)        | 0.05 (0.04-0.09)        | 0.74 (0.61-0.84)        | 0.58 (0.46-0.77)        |
|                                                                                    | Imaging+Clinical Fusion              | 0.69 (0.57-0.80)        | 0.07 (0.05-0.14)        | 0.80 (0.69-0.88)        | 0.69 (0.57-0.82)        |
|                                                                                    | Imaging+Clinical+Segmentation Fusion | <b>0.71 (0.60-0.81)</b> | 0.08 (0.06-0.15)        | <b>0.82 (0.72-0.90)</b> | <b>0.73 (0.60-0.84)</b> |
| Missing PCE data (1y n=1281, % IHD positive=4.6) / (5y n=277, % IHD positive=23.1) | FRS                                  | 0.76 (0.71-0.81)        | 0.11 (0.09-0.15)        | 0.69 (0.64-0.75)        | 0.42 (0.35-0.52)        |
|                                                                                    | PCE                                  | 0.78 (0.73-0.83)        | 0.15 (0.12-0.22)        | 0.73 (0.67-0.78)        | 0.42 (0.36-0.52)        |
|                                                                                    | Segmentation                         | 0.74 (0.69-0.79)        | 0.10 (0.08-0.14)        | 0.68 (0.63-0.75)        | 0.35 (0.31-0.42)        |
|                                                                                    | PCE+Segmentation                     | 0.79 (0.74-0.83)        | 0.13 (0.11-0.17)        | 0.73 (0.67-0.78)        | 0.39 (0.34-0.48)        |
|                                                                                    | Clinical only                        | 0.82 (0.78-0.86)        | 0.18 (0.14-0.26)        | 0.75 (0.70-0.80)        | 0.47 (0.40-0.57)        |
|                                                                                    | Imaging only                         | 0.79 (0.74-0.83)        | 0.17 (0.13-0.25)        | 0.78 (0.72-0.83)        | 0.55 (0.46-0.65)        |
|                                                                                    | Imaging+Clinical Fusion              | <b>0.84 (0.80-0.87)</b> | <b>0.20 (0.15-0.28)</b> | <b>0.80 (0.74-0.85)</b> | 0.57 (0.49-0.67)        |
|                                                                                    | Imaging+Clinical+Segmentation Fusion | 0.82 (0.77-0.85)        | 0.19 (0.15-0.28)        | <b>0.80 (0.75-0.85)</b> | <b>0.61 (0.52-0.69)</b> |
| 40-75 y/o (1y n=1051, % IHD positive=4.4) / (5y n=230, % IHD positive=27.8)        | FRS                                  | 0.67 (0.61-0.72)        | 0.07 (0.06-0.09)        | 0.61 (0.55-0.69)        | 0.39 (0.33-0.48)        |
|                                                                                    | PCE                                  | 0.71 (0.66-0.76)        | 0.08 (0.07-0.10)        | 0.64 (0.57-0.71)        | 0.38 (0.33-0.46)        |
|                                                                                    | Segmentation                         | 0.63 (0.57-0.70)        | 0.06 (0.05-0.09)        | 0.61 (0.54-0.68)        | 0.35 (0.30-0.43)        |
|                                                                                    | PCE+Segmentation                     | 0.71 (0.65-0.76)        | 0.09 (0.07-0.12)        | 0.63 (0.57-0.70)        | 0.35 (0.31-0.42)        |
|                                                                                    | Clinical only                        | <b>0.78 (0.72-0.83)</b> | 0.14 (0.10-0.21)        | 0.68 (0.62-0.74)        | 0.47 (0.40-0.56)        |
|                                                                                    | Imaging only                         | 0.71 (0.63-0.77)        | 0.11 (0.08-0.17)        | 0.73 (0.67-0.79)        | 0.52 (0.44-0.62)        |
|                                                                                    | Imaging+Clinical Fusion              | <b>0.78 (0.73-0.83)</b> | 0.14 (0.11-0.22)        | 0.75 (0.69-0.81)        | 0.56 (0.47-0.66)        |
|                                                                                    | Imaging+Clinical+Segmentation Fusion | 0.77 (0.71-0.82)        | <b>0.15 (0.11-0.23)</b> | <b>0.76 (0.69-0.81)</b> | <b>0.59 (0.51-0.68)</b> |
| Under 40 y/o (1y n=433, % IHD positive=1.2) / (5y n=80, % IHD positive=3.8)        | FRS                                  | 0.50 (0.22-0.80)        | 0.01 (0.01-0.03)        | 0.42 (0.01-0.38)        | 0.07 (0.03-0.24)        |
|                                                                                    | PCE                                  | 0.49 (0.12-0.80)        | 0.02 (0.01-0.07)        | 0.42 (0.04-0.25)        | 0.14 (0.03-0.60)        |
|                                                                                    | Segmentation                         | 0.62 (0.28-0.92)        | 0.04 (0.01-0.16)        | 0.54 (0.25-0.53)        | 0.06 (0.04-0.16)        |
|                                                                                    | PCE+Segmentation                     | 0.65 (0.50-0.91)        | 0.05 (0.02-0.28)        | 0.41 (0.28-0.57)        | 0.04 (0.04-0.06)        |
|                                                                                    | Clinical only                        | 0.76 (0.47-0.95)        | 0.06 (0.02-0.15)        | 0.67 (0.34-0.72)        | 0.11 (0.05-0.38)        |
|                                                                                    | Imaging only                         | 0.79 (0.52-0.95)        | 0.05 (0.03-0.13)        | 0.73 (0.36-0.99)        | 0.17 (0.06-0.52)        |
|                                                                                    | Imaging+Clinical Fusion              | <b>0.80 (0.50-0.96)</b> | <b>0.06 (0.03-0.14)</b> | 0.76 (0.33-0.97)        | 0.19 (0.07-0.57)        |

|                                                                              |                                      |                         |                         |                         |                         |
|------------------------------------------------------------------------------|--------------------------------------|-------------------------|-------------------------|-------------------------|-------------------------|
| Over 75 y/o (1y n=125, % IHD positive=16.0) / (5y n=36, % IHD positive=50.0) | Imaging+Clinical+Segmentation Fusion | <b>0.80 (0.51-0.94)</b> | <b>0.06 (0.03-0.12)</b> | <b>0.79 (0.41-0.99)</b> | <b>0.22 (0.08-0.69)</b> |
|                                                                              | FRS                                  | 0.52 (0.42-0.64)        | 0.16 (0.14-0.22)        | 0.49 (0.35-0.69)        | 0.62 (0.50-0.76)        |
|                                                                              | PCE                                  | <b>0.58 (0.45-0.70)</b> | <b>0.21 (0.17-0.33)</b> | 0.57 (0.44-0.75)        | 0.60 (0.49-0.78)        |
|                                                                              | Segmentation                         | 0.54 (0.42-0.67)        | 0.20 (0.15-0.32)        | 0.44 (0.26-0.59)        | 0.47 (0.41-0.63)        |
|                                                                              | PCE+Segmentation                     | 0.53 (0.44-0.64)        | 0.18 (0.15-0.23)        | 0.63 (0.46-0.79)        | 0.72 (0.60-0.84)        |
|                                                                              | Clinical only                        | 0.55 (0.43-0.67)        | 0.20 (0.16-0.33)        | 0.67 (0.49-0.80)        | 0.69 (0.56-0.84)        |
|                                                                              | Imaging only                         | 0.52 (0.40-0.60)        | 0.19 (0.15-0.31)        | <b>0.81 (0.65-0.92)</b> | <b>0.85 (0.76-0.95)</b> |
|                                                                              | Imaging+Clinical Fusion              | <b>0.58 (0.45-0.67)</b> | 0.20 (0.16-0.32)        | 0.78 (0.61-0.91)        | 0.80 (0.67-0.94)        |
| <hr/>                                                                        |                                      |                         |                         |                         |                         |
| Male (1y n=668, % IHD positive=5.8) / (5y n=128, % IHD positive=27.3)        | Imaging+Clinical+Segmentation Fusion | 0.56 (0.42-0.65)        | 0.20 (0.16-0.31)        | <b>0.81 (0.66-0.92)</b> | <b>0.85 (0.76-0.94)</b> |
|                                                                              | FRS                                  | 0.71 (0.63-0.77)        | 0.13 (0.10-0.20)        | 0.67 (0.59-0.76)        | 0.43 (0.35-0.54)        |
|                                                                              | PCE                                  | 0.70 (0.63-0.77)        | 0.14 (0.10-0.22)        | 0.70 (0.62-0.78)        | 0.49 (0.39-0.60)        |
|                                                                              | Segmentation                         | 0.68 (0.60-0.74)        | 0.11 (0.08-0.17)        | 0.63 (0.56-0.73)        | 0.36 (0.31-0.48)        |
|                                                                              | PCE+Segmentation                     | 0.71 (0.63-0.77)        | 0.12 (0.09-0.19)        | 0.70 (0.62-0.79)        | 0.44 (0.36-0.58)        |
|                                                                              | Clinical only                        | 0.76 (0.69-0.82)        | 0.18 (0.13-0.29)        | 0.70 (0.62-0.78)        | 0.51 (0.41-0.63)        |
|                                                                              | Imaging only                         | 0.74 (0.67-0.79)        | 0.13 (0.11-0.20)        | 0.83 (0.75-0.89)        | 0.71 (0.61-0.81)        |
|                                                                              | Imaging+Clinical Fusion              | <b>0.78 (0.71-0.83)</b> | 0.18 (0.13-0.28)        | <b>0.83 (0.76-0.89)</b> | 0.70 (0.59-0.81)        |
| <hr/>                                                                        |                                      |                         |                         |                         |                         |
| Female (1y n=941, % IHD positive=3.4) / (5y n=218, % IHD positive=22.9)      | Imaging+Clinical+Segmentation Fusion | 0.76 (0.70-0.82)        | <b>0.19 (0.13-0.29)</b> | <b>0.83 (0.76-0.90)</b> | <b>0.72 (0.62-0.83)</b> |
|                                                                              | FRS                                  | 0.82 (0.77-0.86)        | 0.10 (0.08-0.14)        | 0.75 (0.70-0.82)        | 0.47 (0.39-0.57)        |
|                                                                              | PCE                                  | 0.83 (0.78-0.87)        | 0.14 (0.10-0.23)        | 0.75 (0.71-0.82)        | 0.44 (0.37-0.56)        |
|                                                                              | Segmentation                         | 0.76 (0.71-0.82)        | 0.07 (0.06-0.12)        | 0.71 (0.65-0.78)        | 0.37 (0.32-0.47)        |
|                                                                              | PCE+Segmentation                     | 0.81 (0.75-0.85)        | 0.11 (0.08-0.15)        | 0.74 (0.68-0.80)        | 0.41 (0.34-0.52)        |
|                                                                              | Clinical only                        | 0.84 (0.79-0.88)        | 0.13 (0.10-0.20)        | 0.79 (0.75-0.85)        | 0.52 (0.43-0.64)        |
|                                                                              | Imaging only                         | 0.77 (0.69-0.84)        | <b>0.15 (0.09-0.24)</b> | 0.74 (0.68-0.81)        | 0.48 (0.40-0.59)        |
|                                                                              | Imaging+Clinical Fusion              | <b>0.84 (0.79-0.88)</b> | 0.13 (0.10-0.21)        | 0.78 (0.72-0.84)        | 0.53 (0.44-0.64)        |
| <hr/>                                                                        |                                      |                         |                         |                         |                         |
| Asian (1y n=255, % IHD positive=5.1) / (5y n=50, % IHD positive=32.0)        | Imaging+Clinical+Segmentation Fusion | 0.82 (0.76-0.87)        | 0.13 (0.10-0.20)        | <b>0.79 (0.73-0.85)</b> | <b>0.58 (0.48-0.67)</b> |
|                                                                              | FRS                                  | 0.81 (0.72-0.89)        | 0.16 (0.11-0.27)        | 0.76 (0.67-0.90)        | 0.67 (0.53-0.83)        |
|                                                                              | PCE                                  | <b>0.85 (0.75-0.92)</b> | 0.25 (0.16-0.46)        | 0.78 (0.68-0.89)        | 0.61 (0.49-0.77)        |
|                                                                              | Segmentation                         | 0.80 (0.71-0.88)        | 0.22 (0.11-0.39)        | 0.74 (0.66-0.89)        | 0.58 (0.45-0.80)        |
|                                                                              | PCE+Segmentation                     | 0.78 (0.67-0.87)        | 0.15 (0.10-0.23)        | 0.75 (0.64-0.88)        | 0.56 (0.43-0.74)        |
|                                                                              | Clinical only                        | 0.83 (0.73-0.92)        | 0.30 (0.16-0.51)        | 0.84 (0.77-0.94)        | 0.71 (0.57-0.88)        |
|                                                                              | Imaging only                         | 0.77 (0.65-0.86)        | 0.23 (0.11-0.43)        | 0.88 (0.79-0.95)        | 0.73 (0.59-0.93)        |
|                                                                              | Imaging+Clinical Fusion              | <b>0.85 (0.75-0.93)</b> | <b>0.33 (0.18-0.55)</b> | 0.89 (0.81-0.96)        | 0.83 (0.71-0.94)        |
| <hr/>                                                                        |                                      |                         |                         |                         |                         |
|                                                                              | Imaging+Clinical+Segmentation Fusion | 0.83 (0.72-0.92)        | 0.31 (0.17-0.52)        | <b>0.90 (0.82-0.97)</b> | <b>0.86 (0.76-0.95)</b> |

|                                                                                     |                                      |                         |                         |                         |                         |
|-------------------------------------------------------------------------------------|--------------------------------------|-------------------------|-------------------------|-------------------------|-------------------------|
|                                                                                     | FRS                                  | <b>0.94 (0.84-1.00)</b> | 0.39 (0.22-1.00)        | <b>1.00 (1.00-1.00)</b> | <b>1.00 (1.00-1.00)</b> |
|                                                                                     | PCE                                  | 0.83 (0.69-0.96)        | 0.19 (0.11-0.67)        | 0.90 (0.77-1.00)        | 0.70 (0.42-1.00)        |
| Non-Hispanic Black (1y n=50, % IHD positive=4.0)/ (5y n=17, % IHD positive=17.6)    | Segmentation                         | 0.79 (0.57-0.98)        | 0.22 (0.09-0.67)        | 0.90 (0.69-1.00)        | 0.70 (0.42-1.00)        |
|                                                                                     | PCE+Segmentation                     | 0.89 (0.78-0.98)        | 0.22 (0.14-0.67)        | 0.94 (0.73-1.00)        | 0.83 (0.58-1.00)        |
|                                                                                     | Clinical only                        | 0.88 (0.79-0.95)        | 0.19 (0.14-0.50)        | 0.90 (0.69-1.00)        | 0.72 (0.44-1.00)        |
|                                                                                     | Imaging only                         | 0.80 (0.53-1.00)        | <b>0.55 (0.08-1.00)</b> | 0.69 (0.19-0.88)        | 0.54 (0.22-0.92)        |
|                                                                                     | Imaging+Clinical Fusion              | 0.90 (0.76-1.00)        | 0.34 (0.15-1.00)        | 0.81 (0.47-0.94)        | 0.61 (0.31-1.00)        |
|                                                                                     | Imaging+Clinical+Segmentation Fusion | 0.86 (0.69-0.98)        | 0.24 (0.13-0.67)        | 0.86 (0.47-1.00)        | 0.78 (0.49-1.00)        |
|                                                                                     | FRS                                  | 0.74 (0.61-0.86)        | 0.16 (0.10-0.30)        | 0.73 (0.58-0.87)        | 0.53 (0.37-0.72)        |
|                                                                                     | PCE                                  | 0.75 (0.59-0.86)        | 0.22 (0.13-0.43)        | 0.78 (0.65-0.91)        | 0.58 (0.42-0.76)        |
| Hispanic (1y n=328, % IHD positive=4.9)/ (5y n=65, % IHD positive=21.5)             | Segmentation                         | 0.72 (0.61-0.82)        | 0.12 (0.08-0.26)        | 0.67 (0.58-0.83)        | 0.39 (0.27-0.59)        |
|                                                                                     | PCE+Segmentation                     | 0.79 (0.67-0.86)        | 0.14 (0.10-0.23)        | 0.72 (0.60-0.89)        | 0.43 (0.32-0.66)        |
|                                                                                     | Clinical only                        | 0.80 (0.69-0.86)        | 0.16 (0.11-0.30)        | 0.76 (0.67-0.88)        | 0.48 (0.34-0.67)        |
|                                                                                     | Imaging only                         | 0.79 (0.67-0.89)        | 0.21 (0.12-0.36)        | 0.83 (0.72-0.92)        | <b>0.62 (0.46-0.79)</b> |
|                                                                                     | Imaging+Clinical Fusion              | <b>0.81 (0.69-0.88)</b> | 0.20 (0.12-0.36)        | 0.85 (0.76-0.94)        | <b>0.62 (0.47-0.81)</b> |
|                                                                                     | Imaging+Clinical+Segmentation Fusion | 0.80 (0.70-0.87)        | <b>0.21 (0.12-0.38)</b> | <b>0.86 (0.77-0.94)</b> | <b>0.62 (0.47-0.81)</b> |
|                                                                                     | FRS                                  | 0.66 (0.49-0.75)        | 0.08 (0.06-0.14)        | 0.69 (0.52-0.82)        | 0.43 (0.35-0.67)        |
|                                                                                     | PCE                                  | 0.78 (0.65-0.85)        | 0.12 (0.09-0.23)        | 0.75 (0.60-0.88)        | 0.46 (0.37-0.70)        |
| Other (1y n=170, % IHD positive=4.7) / (5y n=36, % IHD positive=30.6)               | Segmentation                         | 0.76 (0.58-0.85)        | 0.14 (0.09-0.33)        | 0.75 (0.61-0.87)        | 0.46 (0.37-0.70)        |
|                                                                                     | PCE+Segmentation                     | 0.77 (0.65-0.89)        | 0.12 (0.08-0.22)        | 0.77 (0.63-0.89)        | 0.48 (0.39-0.71)        |
|                                                                                     | Clinical only                        | 0.79 (0.67-0.91)        | 0.14 (0.10-0.35)        | 0.76 (0.61-0.88)        | 0.58 (0.44-0.77)        |
|                                                                                     | Imaging only                         | <b>0.87 (0.83-0.91)</b> | 0.16 (0.14-0.25)        | 0.78 (0.68-0.92)        | 0.55 (0.42-0.80)        |
|                                                                                     | Imaging+Clinical Fusion              | 0.83 (0.75-0.92)        | <b>0.17 (0.11-0.39)</b> | <b>0.81 (0.69-0.92)</b> | 0.58 (0.44-0.79)        |
|                                                                                     | Imaging+Clinical+Segmentation Fusion | 0.81 (0.75-0.92)        | 0.16 (0.10-0.38)        | 0.80 (0.69-0.92)        | <b>0.59 (0.45-0.81)</b> |
|                                                                                     | FRS                                  | 0.71 (0.63-0.77)        | 0.07 (0.06-0.10)        | 0.67 (0.61-0.75)        | 0.36 (0.29-0.46)        |
|                                                                                     | PCE                                  | 0.73 (0.66-0.79)        | 0.08 (0.07-0.14)        | 0.68 (0.62-0.77)        | 0.40 (0.32-0.50)        |
| Non-Hispanic White (1y n=806, % IHD positive=4.0) / (5y n=178, % IHD positive=23.0) | Segmentation                         | 0.64 (0.57-0.71)        | 0.06 (0.05-0.07)        | 0.64 (0.56-0.72)        | 0.32 (0.27-0.42)        |
|                                                                                     | PCE+Segmentation                     | 0.74 (0.67-0.81)        | 0.10 (0.07-0.15)        | 0.67 (0.60-0.75)        | 0.37 (0.30-0.50)        |
|                                                                                     | Clinical only                        | <b>0.79 (0.73-0.85)</b> | 0.13 (0.09-0.20)        | 0.72 (0.66-0.80)        | 0.45 (0.36-0.57)        |
|                                                                                     | Imaging only                         | 0.71 (0.63-0.78)        | 0.09 (0.07-0.14)        | 0.73 (0.65-0.81)        | 0.55 (0.44-0.68)        |
|                                                                                     | Imaging+Clinical Fusion              | <b>0.79 (0.74-0.85)</b> | 0.12 (0.09-0.19)        | 0.75 (0.67-0.83)        | 0.57 (0.46-0.69)        |
|                                                                                     | Imaging+Clinical+Segmentation Fusion | <b>0.79 (0.72-0.85)</b> | <b>0.14 (0.10-0.22)</b> | <b>0.76 (0.68-0.84)</b> | <b>0.60 (0.50-0.71)</b> |
|                                                                                     | FRS                                  | 0.74 (0.66-0.79)        | 0.10 (0.08-0.15)        | 0.71 (0.65-0.79)        | 0.45 (0.37-0.57)        |

|                                                                                                                  |                                      |                         |                         |                         |                         |
|------------------------------------------------------------------------------------------------------------------|--------------------------------------|-------------------------|-------------------------|-------------------------|-------------------------|
| Taking lipid modifying agents (1y n=809, % IHD positive=4.6) / (5y n=173, % IHD positive=24.9)                   | PCE                                  | 0.77 (0.71-0.83)        | 0.13 (0.10-0.22)        | 0.71 (0.66-0.79)        | 0.42 (0.34-0.54)        |
|                                                                                                                  | Segmentation                         | 0.71 (0.65-0.78)        | 0.09 (0.07-0.12)        | 0.69 (0.61-0.76)        | 0.40 (0.33-0.52)        |
|                                                                                                                  | PCE+Segmentation                     | 0.76 (0.69-0.81)        | 0.11 (0.09-0.15)        | 0.70 (0.64-0.77)        | 0.39 (0.33-0.50)        |
|                                                                                                                  | Clinical only                        | <b>0.81 (0.77-0.87)</b> | <b>0.15 (0.11-0.22)</b> | 0.76 (0.71-0.83)        | 0.53 (0.44-0.64)        |
|                                                                                                                  | Imaging only                         | 0.73 (0.66-0.79)        | 0.10 (0.08-0.17)        | 0.74 (0.66-0.81)        | 0.58 (0.48-0.69)        |
|                                                                                                                  | Imaging+Clinical Fusion              | 0.80 (0.75-0.86)        | 0.14 (0.11-0.23)        | <b>0.77 (0.70-0.84)</b> | 0.61 (0.52-0.71)        |
|                                                                                                                  | Imaging+Clinical+Segmentation Fusion | 0.79 (0.73-0.85)        | 0.14 (0.11-0.22)        | 0.77 (0.71-0.84)        | <b>0.62 (0.53-0.72)</b> |
|                                                                                                                  | FRS                                  | 0.73 (0.66-0.80)        | 0.10 (0.08-0.14)        | 0.70 (0.63-0.78)        | 0.43 (0.35-0.54)        |
| Not taking lipid modifying agents (1y n=800, % IHD positive=4.2) / (5y n=173, % IHD positive=24.3)               | PCE                                  | 0.76 (0.68-0.82)        | 0.14 (0.10-0.23)        | 0.76 (0.69-0.82)        | 0.50 (0.40-0.61)        |
|                                                                                                                  | Segmentation                         | 0.69 (0.61-0.76)        | 0.08 (0.06-0.14)        | 0.67 (0.61-0.76)        | 0.35 (0.30-0.45)        |
|                                                                                                                  | PCE+Segmentation                     | 0.77 (0.70-0.83)        | 0.11 (0.09-0.16)        | 0.74 (0.68-0.82)        | 0.47 (0.38-0.58)        |
|                                                                                                                  | Clinical only                        | 0.79 (0.72-0.84)        | 0.17 (0.11-0.27)        | 0.76 (0.70-0.83)        | 0.52 (0.43-0.64)        |
|                                                                                                                  | Imaging only                         | 0.80 (0.73-0.86)        | 0.16 (0.12-0.26)        | 0.81 (0.75-0.87)        | 0.57 (0.47-0.70)        |
|                                                                                                                  | Imaging+Clinical Fusion              | <b>0.82 (0.76-0.87)</b> | 0.19 (0.13-0.32)        | <b>0.84 (0.77-0.89)</b> | 0.60 (0.51-0.75)        |
|                                                                                                                  | Imaging+Clinical+Segmentation Fusion | 0.81 (0.75-0.86)        | <b>0.21 (0.13-0.33)</b> | <b>0.84 (0.78-0.89)</b> | <b>0.66 (0.56-0.78)</b> |
|                                                                                                                  | FRS                                  | 0.71 (0.55-0.83)        | 0.02 (0.02-0.04)        | 0.72 (0.62-0.82)        | 0.19 (0.11-0.30)        |
| Acute IHD (I21,I22) positives only (1y n=1552, % IHD positive=0.9) / (5y n=281, % IHD positive=7.1)              | PCE                                  | 0.76 (0.60-0.88)        | 0.03 (0.02-0.07)        | 0.72 (0.60-0.80)        | 0.18 (0.12-0.31)        |
|                                                                                                                  | Segmentation                         | 0.70 (0.61-0.81)        | 0.02 (0.01-0.03)        | 0.73 (0.63-0.80)        | 0.15 (0.11-0.25)        |
|                                                                                                                  | PCE+Segmentation                     | 0.78 (0.64-0.89)        | 0.03 (0.02-0.05)        | 0.73 (0.63-0.81)        | 0.18 (0.12-0.31)        |
|                                                                                                                  | Clinical only                        | 0.79 (0.69-0.89)        | 0.03 (0.02-0.07)        | 0.75 (0.65-0.83)        | 0.31 (0.18-0.49)        |
|                                                                                                                  | Imaging only                         | <b>0.81 (0.69-0.90)</b> | 0.03 (0.02-0.06)        | 0.86 (0.77-0.92)        | 0.44 (0.29-0.62)        |
|                                                                                                                  | Imaging+Clinical Fusion              | <b>0.81 (0.68-0.91)</b> | <b>0.04 (0.03-0.08)</b> | <b>0.87 (0.78-0.93)</b> | 0.46 (0.32-0.63)        |
|                                                                                                                  | Imaging+Clinical+Segmentation Fusion | <b>0.81 (0.70-0.91)</b> | <b>0.04 (0.03-0.08)</b> | 0.86 (0.77-0.93)        | <b>0.49 (0.34-0.67)</b> |
|                                                                                                                  | FRS                                  | 0.74 (0.70-0.79)        | 0.08 (0.07-0.11)        | 0.70 (0.65-0.76)        | 0.38 (0.31-0.48)        |
| non-acute IHD (I20,I23,I24,I25) positives only (1y n=1595, % IHD positive=3.6) / (5y n=326, % IHD positive=19.9) | PCE                                  | 0.77 (0.72-0.81)        | 0.11 (0.08-0.17)        | 0.74 (0.69-0.79)        | 0.38 (0.32-0.48)        |
|                                                                                                                  | Segmentation                         | 0.70 (0.65-0.75)        | 0.07 (0.06-0.10)        | 0.67 (0.61-0.73)        | 0.29 (0.25-0.36)        |
|                                                                                                                  | PCE+Segmentation                     | 0.76 (0.72-0.80)        | 0.09 (0.07-0.11)        | 0.72 (0.66-0.77)        | 0.34 (0.29-0.43)        |
|                                                                                                                  | Clinical only                        | 0.80 (0.76-0.84)        | 0.12 (0.10-0.18)        | 0.76 (0.71-0.81)        | 0.44 (0.37-0.54)        |
|                                                                                                                  | Imaging only                         | 0.75 (0.70-0.80)        | 0.10 (0.08-0.16)        | 0.75 (0.69-0.80)        | 0.45 (0.37-0.55)        |
|                                                                                                                  | Imaging+Clinical Fusion              | <b>0.81 (0.77-0.85)</b> | <b>0.13 (0.10-0.19)</b> | 0.78 (0.73-0.83)        | 0.50 (0.42-0.60)        |
|                                                                                                                  | Imaging+Clinical+Segmentation Fusion | 0.80 (0.75-0.83)        | <b>0.13 (0.10-0.19)</b> | <b>0.79 (0.73-0.84)</b> | <b>0.55 (0.47-0.64)</b> |
|                                                                                                                  | FRS                                  | 0.74 (0.70-0.79)        | 0.08 (0.07-0.11)        | 0.70 (0.65-0.76)        | 0.38 (0.31-0.48)        |
